# Supplementary material for: Constructing a prediction model for physiological parameters for malnutrition in hemodialysis patients
Source: PubMed Central journal article supplement (PMC6656719; doi:10.1038/s41598-019-47130-7), 2019-07-24

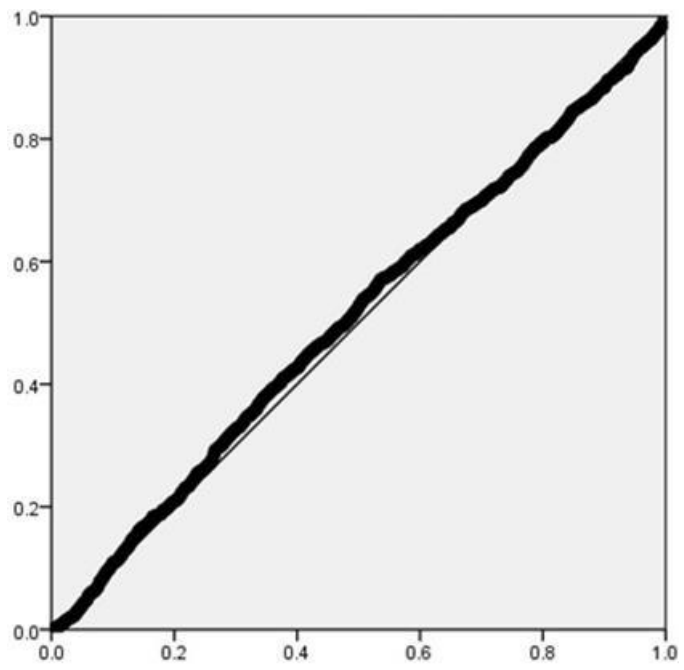

Supplement: 41598_2019_47130_MOESM2_ESM.pdf [file 41598_2019_47130_MOESM2_ESM.pdf]
